# Supplementary material
Source: PubMed Central journal article supplement (PMC4396470)
Supplement: JCI77716sd.pdf [file JCI77716sd.pdf]

## SUPPLEMENTAL MATERIAL

### Supplemental Figures

#### Supplemental Figure 1:

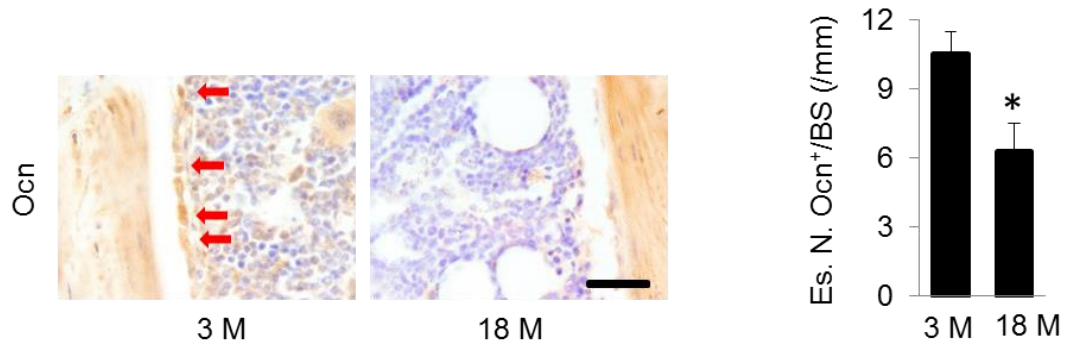

**Supplemental Figure 1:** Representative images of osteocalcin immunohistochemical staining and quantification of osteoblast number on endosteal bone surface of distal femora of 3 months old (3 M) and 18 months old (18 M) female C57BL/6 mice. Scale bar: 50  $\mu$ M. Es.N.Ocn<sup>+</sup>/BS, number of osteocalcin<sup>+</sup> cells per endosteal bone surface. n=5 per group; \*p < 0.05. (Student's *t*-test).

## Supplemental Figure 2:

A.

```
CCCTCTTGGTCCGCATGTGTGTGTTCCCTCCTGCCTTACCCACCATCAGTTTCATGTAGCTGGTTT
GTTGTTTCTGCGTGATCCCTGGGCTGCTTTCTGTTGCTTTTTCCATAGAAAGTACCTACCTGTTG
TGCCAAGAGAGTGAACCCTTCCCTGCTCCCTCTCTCACATCCCTTGCATGGTGAAGGCTGAGCTC
TCTGAAAACCCCTCCCACATGCAGGGTTTGCAGGATGGTGAGCTTCAGCTTTCCCTTGCTCTCTTG
TGCATGGTGGACATATGCATACACAACCTTCATAAAGAAAACCCACATACCCAAGGAAACAGCCA
TCTGTCTGTCTTCCACCTGACATGCACATCTCACAGTTTTCTTTCTCCAGGGAGGGCTCATGTG
TCCCATGCTGCCTTTGAACTCCCTGCATAGC -171bp
```

B. F0 -/- +/- +/+ M

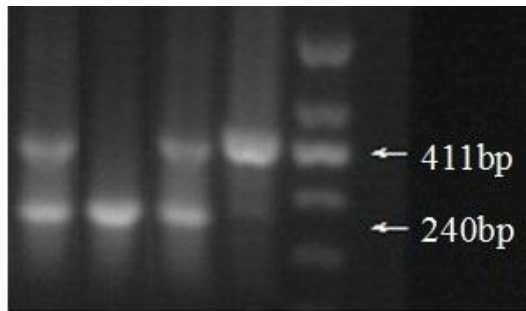

**Supplemental Figure 2: The miR-188 knock out mice construction.** (A) The sequence in green showed the target bonding sites of miR-188 TALEN plasmids Left-pCS2-PEAS and Right-pCS2-PERR; The Sequences in red indicate mature miR-188; The sequence in yellow showed the Primer sites for PCR; The sequences underlined indicate the knockout sequences. (B) Female founder mouse (F0) harboring TALEN-induced mutations was crossed to male wild-type mouse to generate F1 offspring. F1 offspring were used to mate to generate: homozygote<sup>-/-</sup>, heterozygote<sup>+/-</sup>, wild-type<sup>+/+</sup>; (M, 1000-bp marker DNA.)

### Supplemental Figure 3

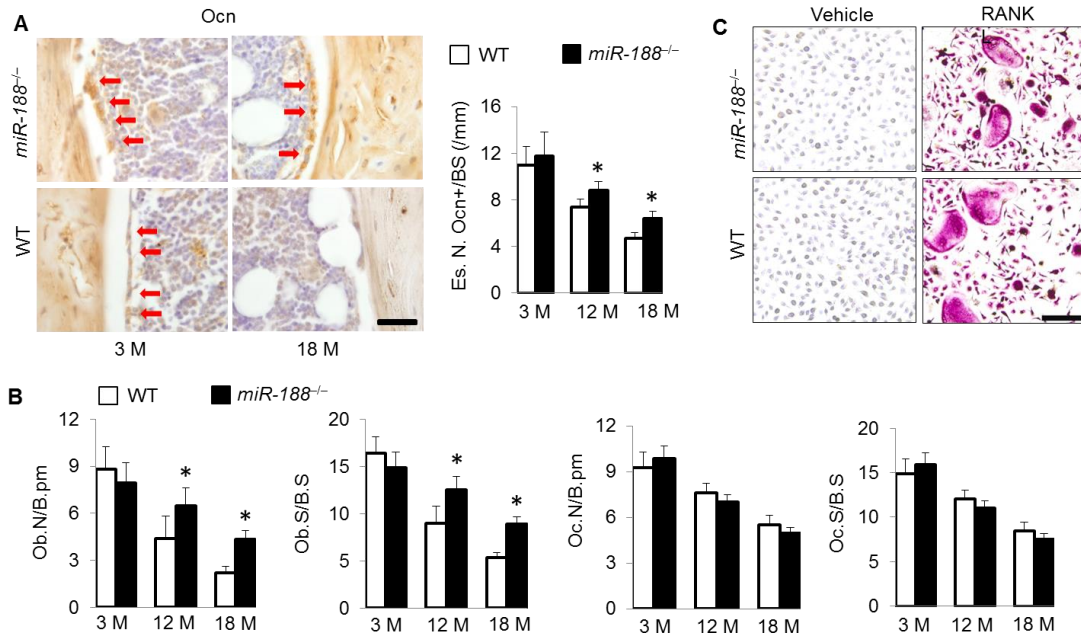

**Supplemental Figure 3: Aged *miR-188*<sup>-/-</sup> mice shows increased osteoblasts on bone surface without affecting osteoclast.** (A) Representative images of osteocalcin immunohistochemical staining of femora from 3 months (3 M) and 18 months (18 M) old wild-type (WT) and *miR-188* knockout (*miR-188*<sup>-/-</sup>) mice. Scale bar: 50  $\mu$ M. Quantification data of osteocalcin<sup>+</sup> cells in endosteal bone surface. Es.N.Ocn<sup>+</sup>/BS, number of osteocalcin<sup>+</sup> cells per endosteal bone surface. n=5 per group; (B) Bone histomorphometric analysis of femora. Number of osteoblasts per bone perimeter (N.Ob/B.Pm), osteoblast surface per bone surface (Ob.S/BS), number of osteoclasts per bone perimeter (N.Oc/B.Pm), and osteoclast surface per bone surface (Oc.S/BS), were measured. n=5 per group; (C) Osteoclast differentiation of monocytes cultured with M-CSF and RANKL from WT and *miR-188*<sup>-/-</sup> mice. \*p < 0.05. (Student's *t*-test)

## Supplemental Figure 4

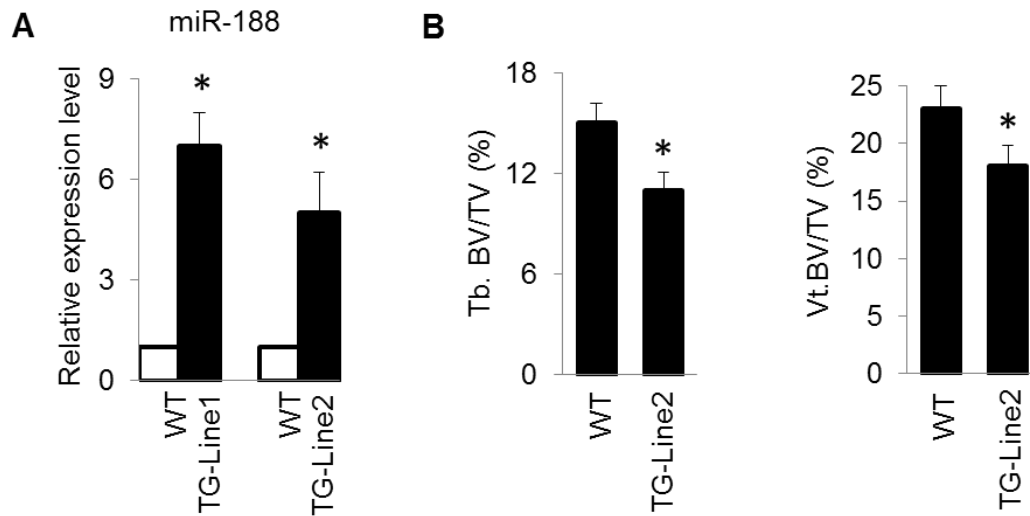

**Supplemental Figure 4: miR-188 expression and bone volume in miR-188 transgenic (TG) mice and wild-type (WT) mice.** (A) Expression of miR-188 in osterix<sup>+</sup> osteoprogenitor cells from 6 month-old WT, TG line1 and TG line2 female mice was determined using real-time RT-PCR. (B) Quantitative micro-CT analysis of femora and vertebra from TG line 2 mice. Ratio of trabecular bone volume to tissue volume (Tb.BV/TV); Ratio of L4 vertebra bone volume to tissue volume (Vt.BV/TV) are shown. n=6 per group; \*p < 0.05. (Student's *t*-test)

## Supplemental Figure 5

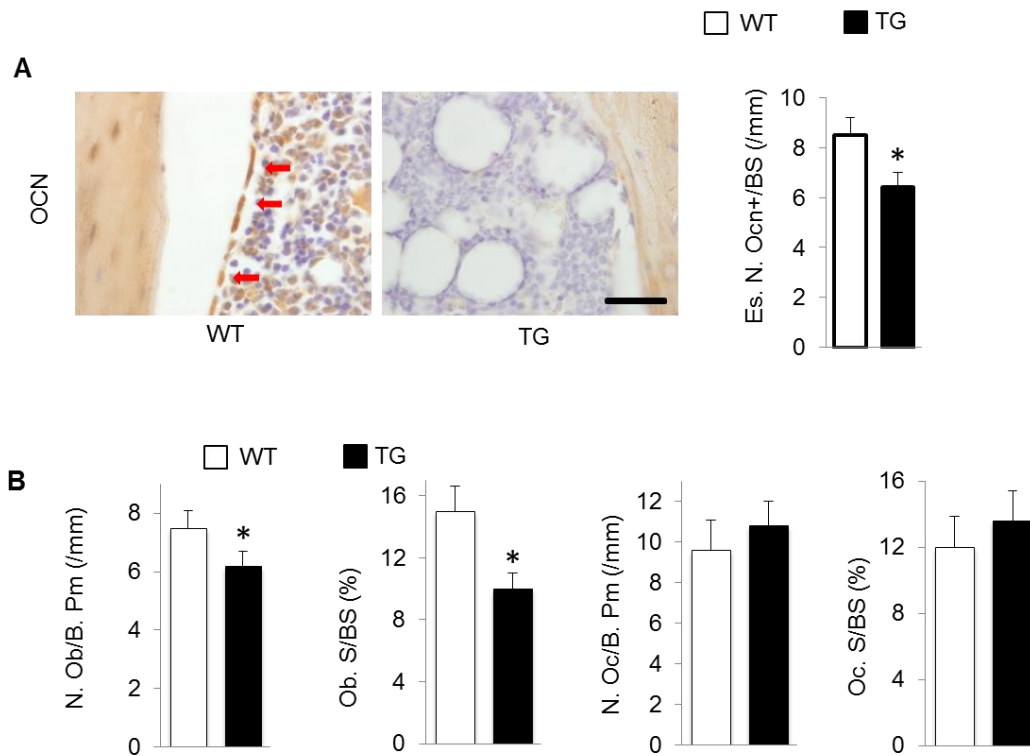

**Supplemental Figure 5: miR-188 transgenic (TG) mice shown decreased osteoblasts number and surface in bone surface without affecting osteoclasts** (A) Representative images of osteocalcin immunohistochemical staining of femora from 6 months old WT and TG female mice. Scale bar: 50 $\mu$ M. Quantification data of osteocalcin<sup>+</sup> cells in endosteal bone surface. Es.N.Ocn<sup>+</sup>/BS, number of osteocalcin<sup>+</sup> cells per endosteal bone surface. n=5 per group. (B) Bone histomorphometric analysis of femora. Number of osteoblasts per bone perimeter (N.Ob/B.Pm), osteoblast surface per bone surface (Ob.S/BS), number of osteoclasts per bone perimeter (N.Oc/B.Pm), and osteoclast surface per bone surface (Oc.S/BS), were measured. n=6 per group; \*p < 0.05. (Student's *t*-test).

**Supplemental Figure 6:**

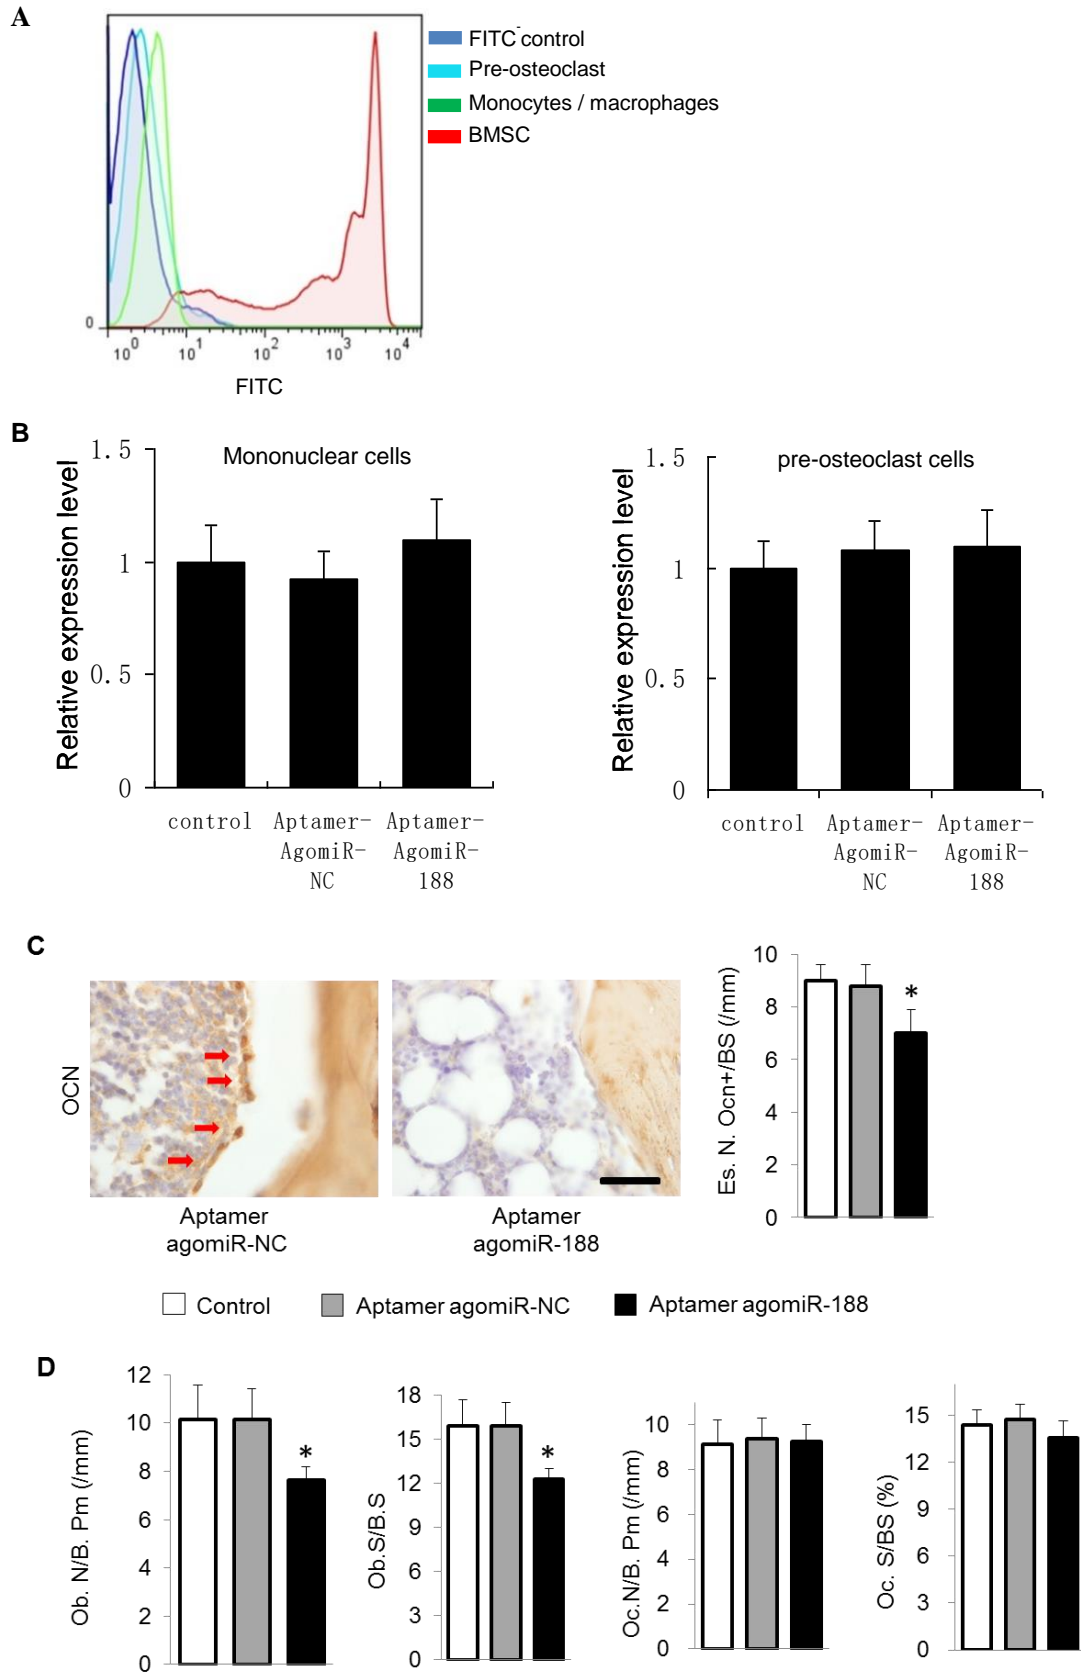

**Supplemental Figure 6: Mice with BMSCs-specific overexpression of miR-188 using aptamer delivery system presented reduced bone formation and unchanged bone resorption.**

(A) The red curve represents the BMSCs incubated with fluorescein isothiocyanate (FITC) aptamer; the cyan curve and green curve represent the pre-osteoclasts and mononuclear cells incubated with FITC aptamer respectively, the blue curve represents the FITC negative control. (B) Expression of miR-188 in mononuclear and pre-osteoclast cells of mice was determined using real-time RT-PCR. NC: negative control. (C) Representative images of osteocalcin immunohistochemical staining of femora. Scale bar: 50  $\mu$ M. Quantification data of osteocalcin<sup>+</sup> cells in endosteal bone surface. Es.N.Ocn<sup>+</sup>/BS, number of osteocalcin<sup>+</sup> cells per endosteal bone surface. n=8 per group. (D) Bone histomorphometric analysis of femora. Number of osteoblasts per bone perimeter (N.Ob/B.Pm), osteoblast surface per bone surface (Ob.S/BS), number of osteoclasts per bone perimeter (N.Oc/B.Pm), and osteoclast surface per bone surface (Oc.S/BS), were measured. n=8 per group; \*p < 0.05. (ANOVA).

### Supplemental Figure 7:

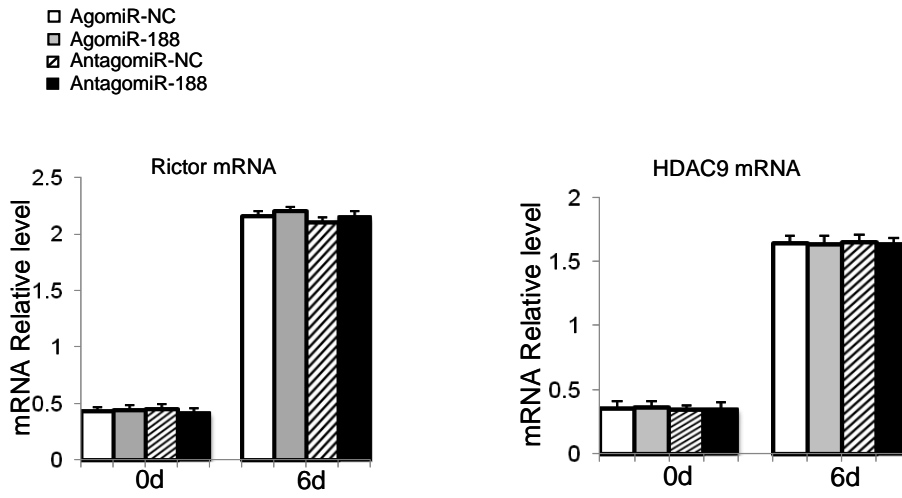

**Supplemental Figure 7: MiR-188 regulates HDAC9 and Rictor via post-transcription mechanism.** The levels of HDAC9 and Rictor mRNA in BMSCs cells transfected with agomiR-188 were determined using qRT-PCR and normalized to  $\beta$ -actin. n=5 per group.



## Supplemental Figure 8:

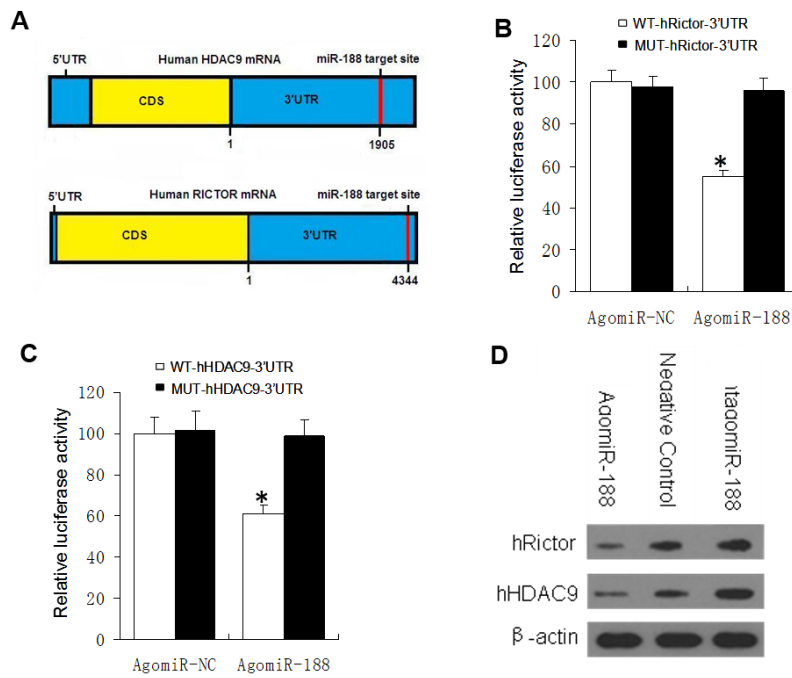

### Supplemental Figure 8: miR-188 targets HDAC9 and Rictor in human BMSCs

(A) The predicted target sites of miR-188 in human HDAC9 and Rictor mRNA. (B and C) Luciferase reporter gene assay-based evaluation of the miR-188 targeting sites in HDAC9 and Rictor mRNA in BMSCs. NC, negative control.  $n = 5$  per group; \* $P < 0.05$ . (Student's  $t$ -test). (D) Western blot for HDAC9 and Rictor protein in human BMSCs after transfection of agomiR-188 and antagomiR-188. Data are representative of 3 independent experiments.

**Supplemental Figure 9:**

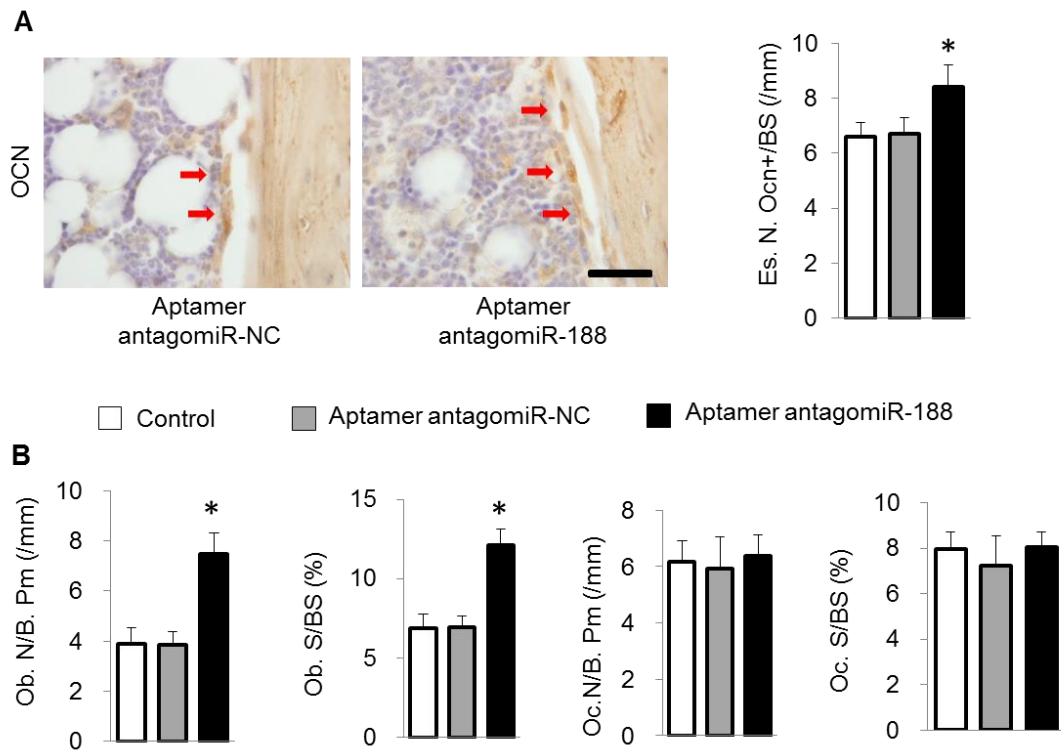

**Supplemental Figure 9: Injection of Aptamer-antagomiR-188 into bone marrow stimulated bone formation in aged mice without affecting bone resorption. (A)** Representative images of osteocalcin immunohistochemical staining of femora from antagomiR-188 aptamer treated mice. Scale bar: 50  $\mu$ M. Quantification data of osteocalcin<sup>+</sup> cells in endosteal bone surface. Es.N.Ocn<sup>+</sup>/BS, number of osteocalcin<sup>+</sup> cells per endosteal bone surface. n=5 per group. **(D)** Bone histomorphometric analysis of femora from aptamer treated mice. Number of osteoblasts per bone perimeter (N.Ob/B.Pm), osteoblast surface per bone surface (Ob.S/BS), number of osteoclasts per bone perimeter (N.Oc/B.Pm), and osteoclast surface per bone surface (Oc.S/BS), were measured. n=6 per group; \*p < 0.05. (ANOVA).

**Supplemental Table 1. The alignment of miR-188 with WT and MUT 3'UTR region showing in complementary pairing.**

|               |                              |
|---------------|------------------------------|
| mHDAC9 WT     | 5' -AAUCUCAUAAAAAAGGGUA-3'   |
| miR-188       | 3' -GGGAGGUGGUACGUUCCCUAC-5' |
| mHDAC9 Mut    | 5' -AAUCUCAUAAAAATGCGUA-3'   |
|               |                              |
| mRictor WT-1  | 5' -UUUGAAAAGUGGUAAGGGAUU-3' |
| miR-188       | 3' -GGGAGGUGGUACGUUCCCUAC-5' |
| mRictor Mut-1 | 5' -UUUGAAAAGUGGUAACGTAUU-3' |
|               |                              |
| mRictor WT-2  | 5' -CAUAAUCUUAUCAAGGGAUU-3'  |
| miR-188       | 3' -GGGAGGUGGUACGUUCCCUAC-5' |
| mRictor Mut-2 | 5' -CAUAAUCUUAUCAACGTAUU-3'  |
|               |                              |
| hRictor WT    | 5' -CATAATCTTATCAAAGGGATA-3' |
| miR-188       | 3' -GGGAGGUGGUACGTTCCCTAC-5' |
| hRictor Mut   | 5' -CATAATCTTATCAAACGCATA-3' |
|               |                              |
| hHDAC9 WT     | 5' -CAATCTCATAAAAAAGGGATA-3' |
| miR-188       | 3' -GGGAGGUGGUACGUUCCCUAC-5' |
| hHDAC9 Mut    | 5' -CAATCTCATAAAAAACGCATA-3' |

The complementary nucleotides are labeled in green. The mutated nucleotides are labeled in red.

**Supplemental Table 2. Nucleotide sequences of primers for WT and mutant reporter plasmids.**

| Gene                      | Acc. No      | Primer sequence(5'to3')                                     |
|---------------------------|--------------|-------------------------------------------------------------|
| mRictor<br>UTR1           | NM_030168    | F: GCTCTAGATGTTCCATTACTAGCCTGTC                             |
|                           |              | R: GGCCGGCCAACACCAGAACCTCCAAA                               |
| Mutant<br>mRictor<br>UTR1 |              | F: TTGAAAAGTGGTAA <u>C</u> G <u>T</u> ATTATAAAGAGGAT        |
|                           |              | R: ATCCTCTTTATAATACGTTACCACTTTTCAA                          |
| Rictor<br>mUTR2           | NM_030168    | F: GCTCTAGAAATGGTTTTGCTCACTTT                               |
|                           |              | R: GGCCGGCCAGTACATTTTATTAACAATG                             |
| Mutant<br>mRictor<br>UTR2 |              | F: ATAATCTTATCAA <u>A</u> C <u>G</u> TATTCATTGTTAAT         |
|                           |              | R: ATTAACAATGAATACGTTTGATAAGATTAT                           |
| mHDAC9                    | NM_001271386 | F: CATCTAGAAGGCAATTTTCCCTATCA                               |
|                           |              | R: GGCCGGCCTGTTCCCTCCCAAATAAA                               |
| Mutant<br>mHDAC9          |              | F: ATCTCATAAAAAA <u>A</u> T <u>G</u> <u>C</u> ATAGTGCATCTTT |
|                           |              | R: AAAGATGCACTATGCATTTTTTTTATGAGAT                          |
| hHDAC9                    | NM_001204144 | F: CATCTAGAGTTAGTATATTCCTTCAT                               |
|                           |              | R: GGCCGGCCCTCTCTCAAATGACATTA                               |
| Mutant<br>hHDAC9          |              | F: ATCTCATAAAAA <u>A</u> C <u>G</u> CAATAGTGCATCTTT         |
|                           |              | R: AAAAGATGCACTATGCGTTTTTTTATGAGAT                          |
| hRictor                   | NM_152756    | F: GCTCTAGACATTGAGTTGTGTATAAT                               |
|                           |              | R: GGCCGGCCTAAGAATTTTAAGTACAT                               |
| Mutant<br>hRictor         |              | F: ATAATCTTATCAA <u>A</u> C <u>G</u> CATACATTGTTAAT         |
|                           |              | R: ATTAACAATGTATGCGTTTGATAAGATTAT                           |

Note: F, forward primer; R, reverse primer; Acc. No, Genbank accession numbers;

**Supplemental Table 3. Nucleotide sequences of primers used for quantitative RT-PCR detection for microRNA**

|          | Primer    | Primer sequence(5' to 3')                                |
|----------|-----------|----------------------------------------------------------|
| miR-188a | RT primer | GTCGTATCCAGTGCAGGGTCCGAGGTATTTCGC<br>ACTGGATACGAC CCCTCC |
|          | Forward   | GCCGCCATCCCTTGCATG                                       |
|          | Reverse   | CCAGTGCAGGGTCCGAGGTA                                     |
| U6       | RT primer | GAACGCTTCACGAATTTGCGTGTCAT                               |
|          | Forward   | CTCGCTTCGGCAGCACA                                        |
|          | Reverse   | AACGCTTCACGAATTTGCGT                                     |

**Supplemental Table 4. Nucleotide sequences of primers used for quantitative RT-PCR detection for mRNA**

| Gene                   | Acc. No      | Primer sequence(5'to3')   | Size |
|------------------------|--------------|---------------------------|------|
| PPAR $\gamma$ (mouse)  | NM_001127330 | F: GACCACTCGCATTCCCTTT    | 18   |
|                        |              | R: CCACAGACTCGGCACTCA     | 18   |
| Fabp4 (mouse)          | NM_024406    | F: AAATCACCGCAGACGACA     | 18   |
|                        |              | R: CACATTCCACCACCAGCT     | 18   |
| Runx2 (mouse)          | NM_001146038 | F: ACTTCCTGTGCTCCGTGCTG   | 20   |
|                        |              | R: TCGTTGAACCTGGCTACTTGG  | 21   |
| $\beta$ -actin (mouse) | NM_007393    | F: CTGTCCCTGTATGCCTCTG    | 19   |
|                        |              | R: TGATGTCACGCACGATTT     | 18   |
| HDAC9 (mouse)          | NM_024124    | F: GATGATGATGCCTGTGGT     | 18   |
|                        |              | R: AGTTCCTTGATGTGCTCC     | 18   |
| Rictor (mouse)         | NM_030168    | F: CGGCGAATCAGAACACTT     | 18   |
|                        |              | R: TGAGCCTTCCACAACCAA     | 18   |
| Osterix (mouse)        | NM_130458    | F: ACCAGGTCCAGGCAACAC     | 18   |
|                        |              | R: GCAAAGTCAGATGGGTAAGTAG | 22   |

Note: F, forward primer; R, reverse primer; Acc. No, Genbank accession numbers; Size, primer size.
